# Supplementary material
Source: publisher figshare collection journal article supplement (https://frontiersin.figshare.com/ndownloader/files/28983921)

cZ

Peak Area

$$\hat{y} = 194677.4461 x - 3094.859, R^2 = 1$$

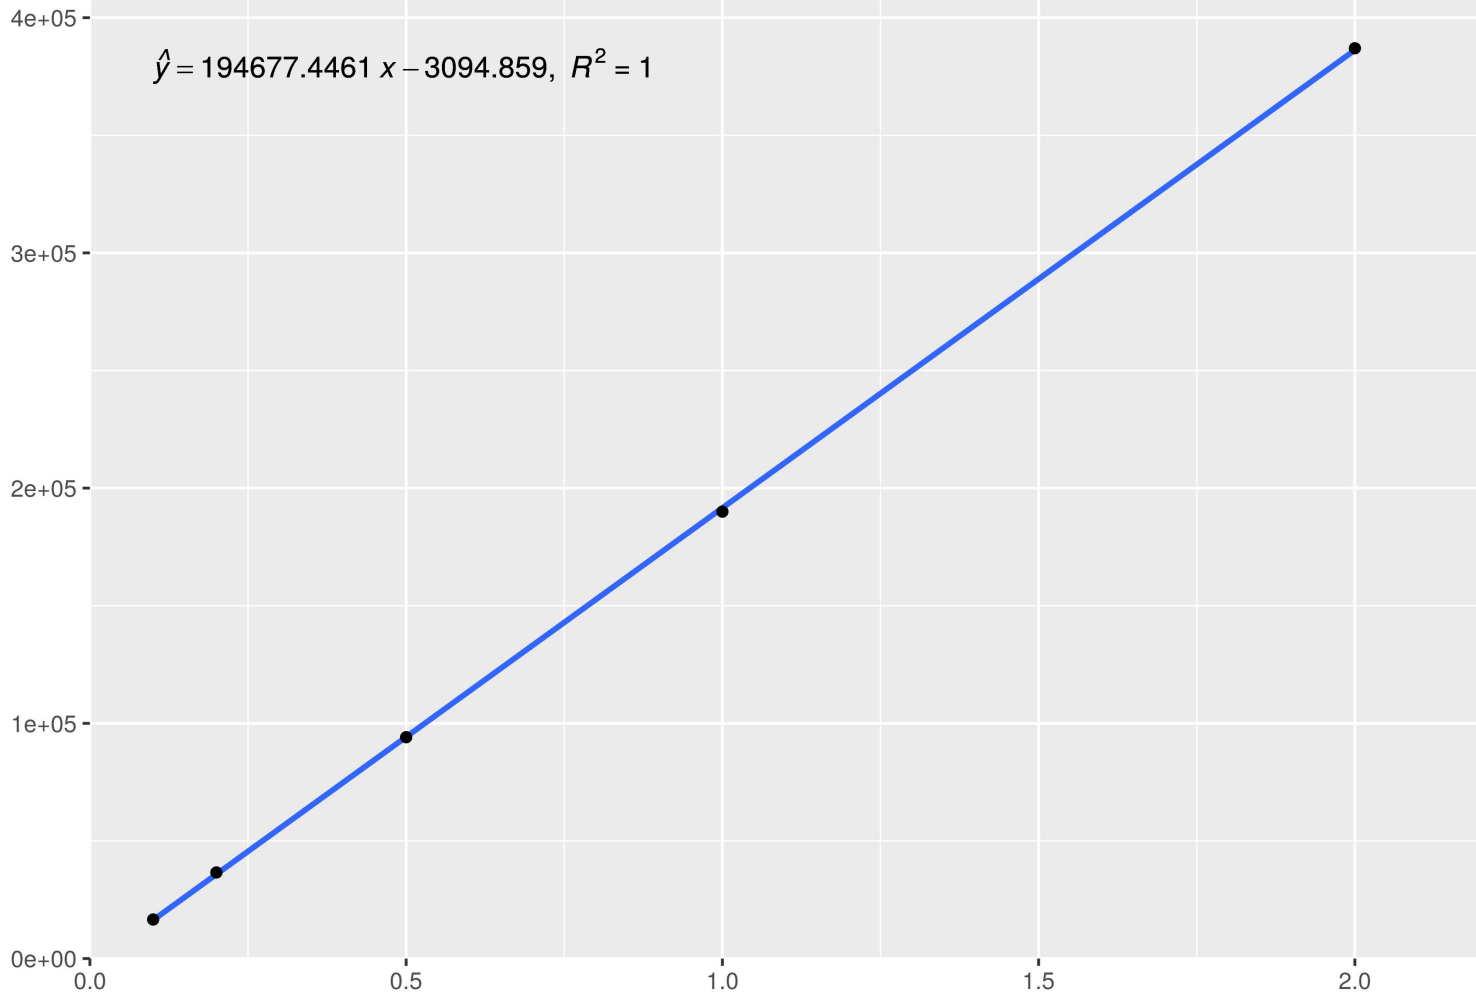

Standard Concentration (ng/mL)

## IAA

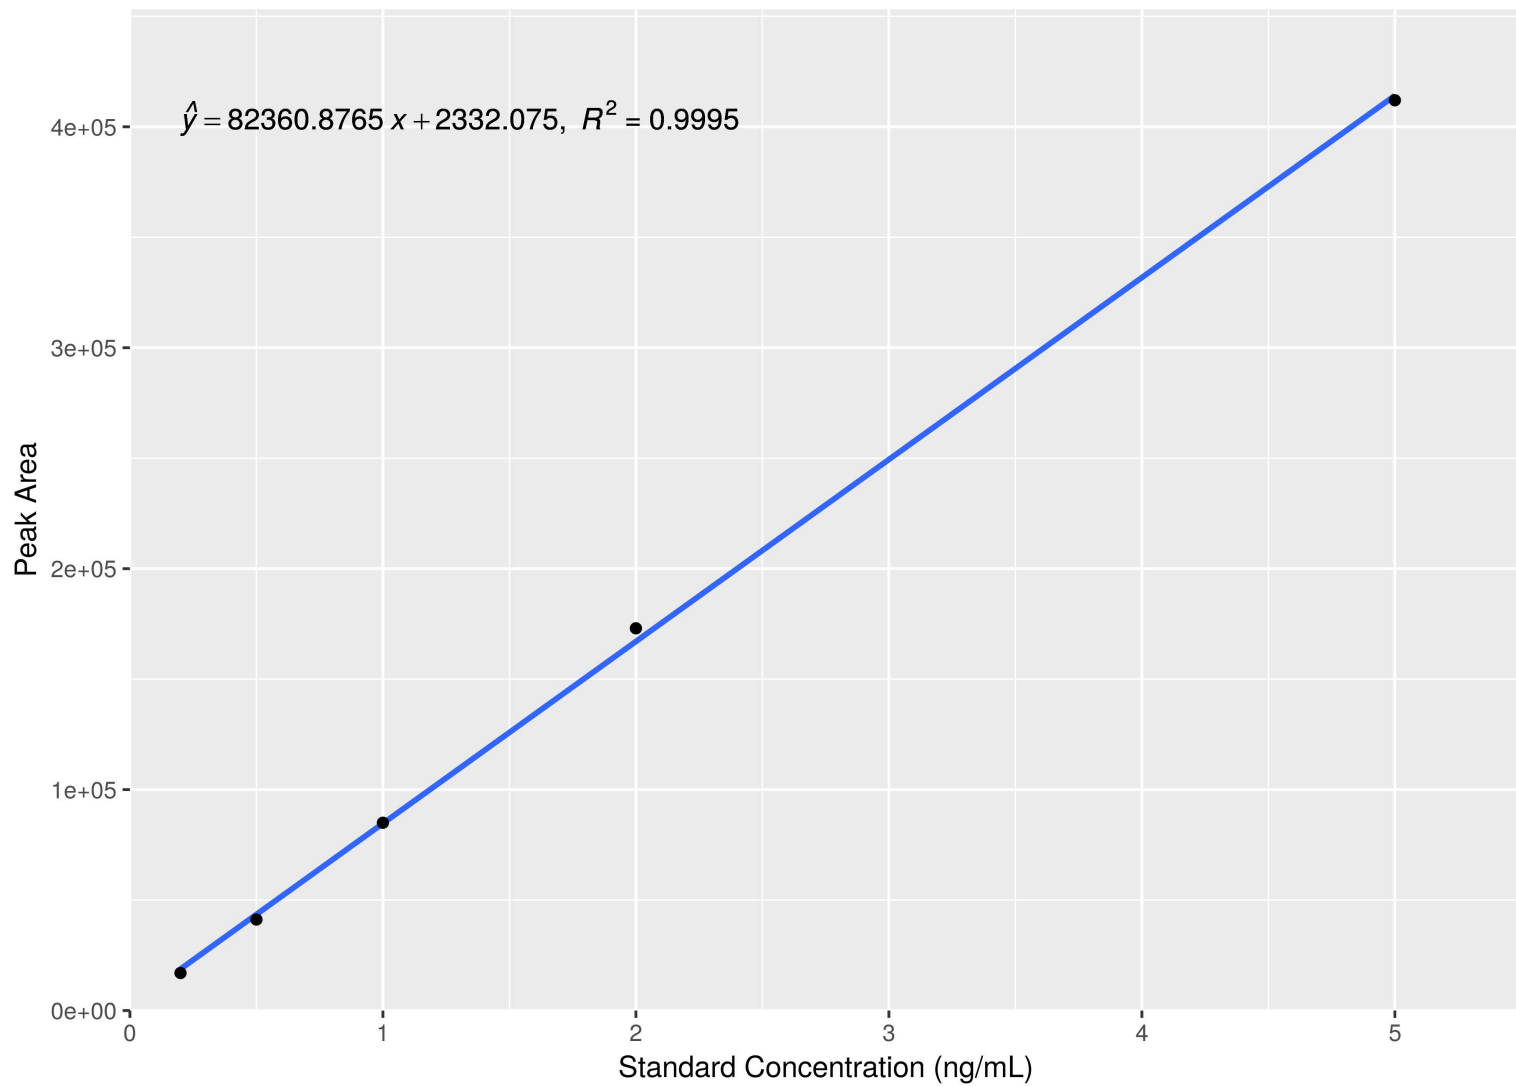

## ICA

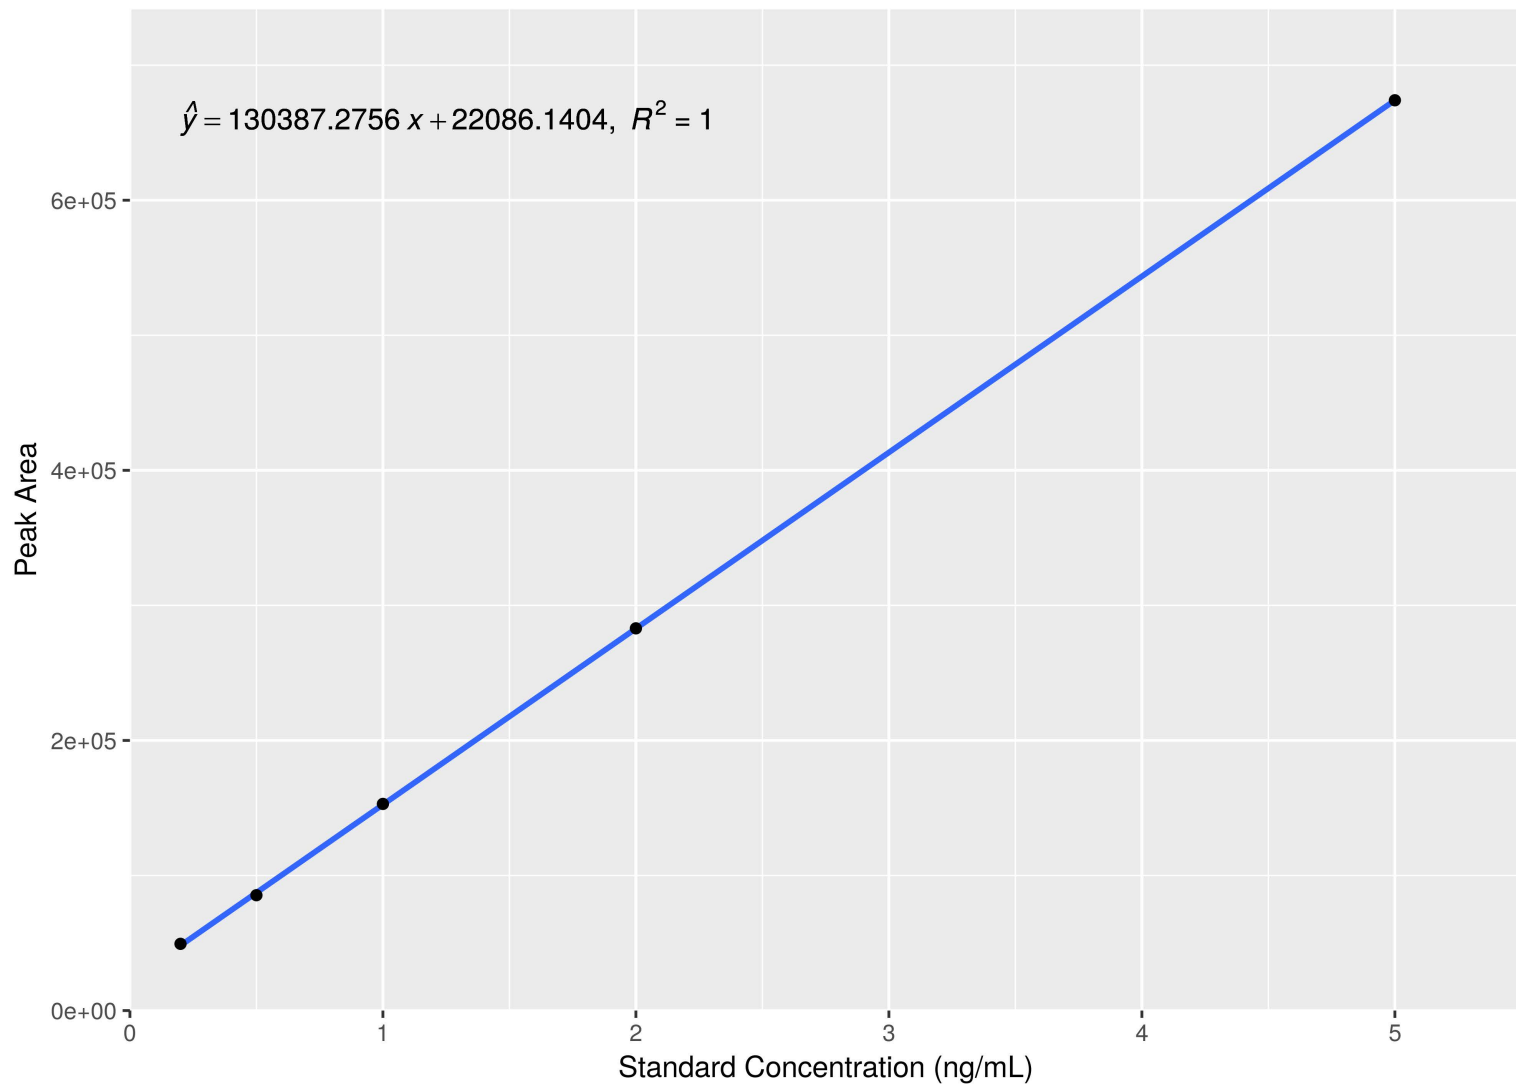

Supplement: Supplementary file [file 28983921]
